# Supplementary figures and images for: Antimicrobial Multiresistant Phenotypes of Genetically Diverse Pseudomonas spp. Isolates Associated with Tomato Plants in Chilean Orchards
Source: MDPI journal article supplement (doi:10.3390/horticulturae8080750), 2022-08-19

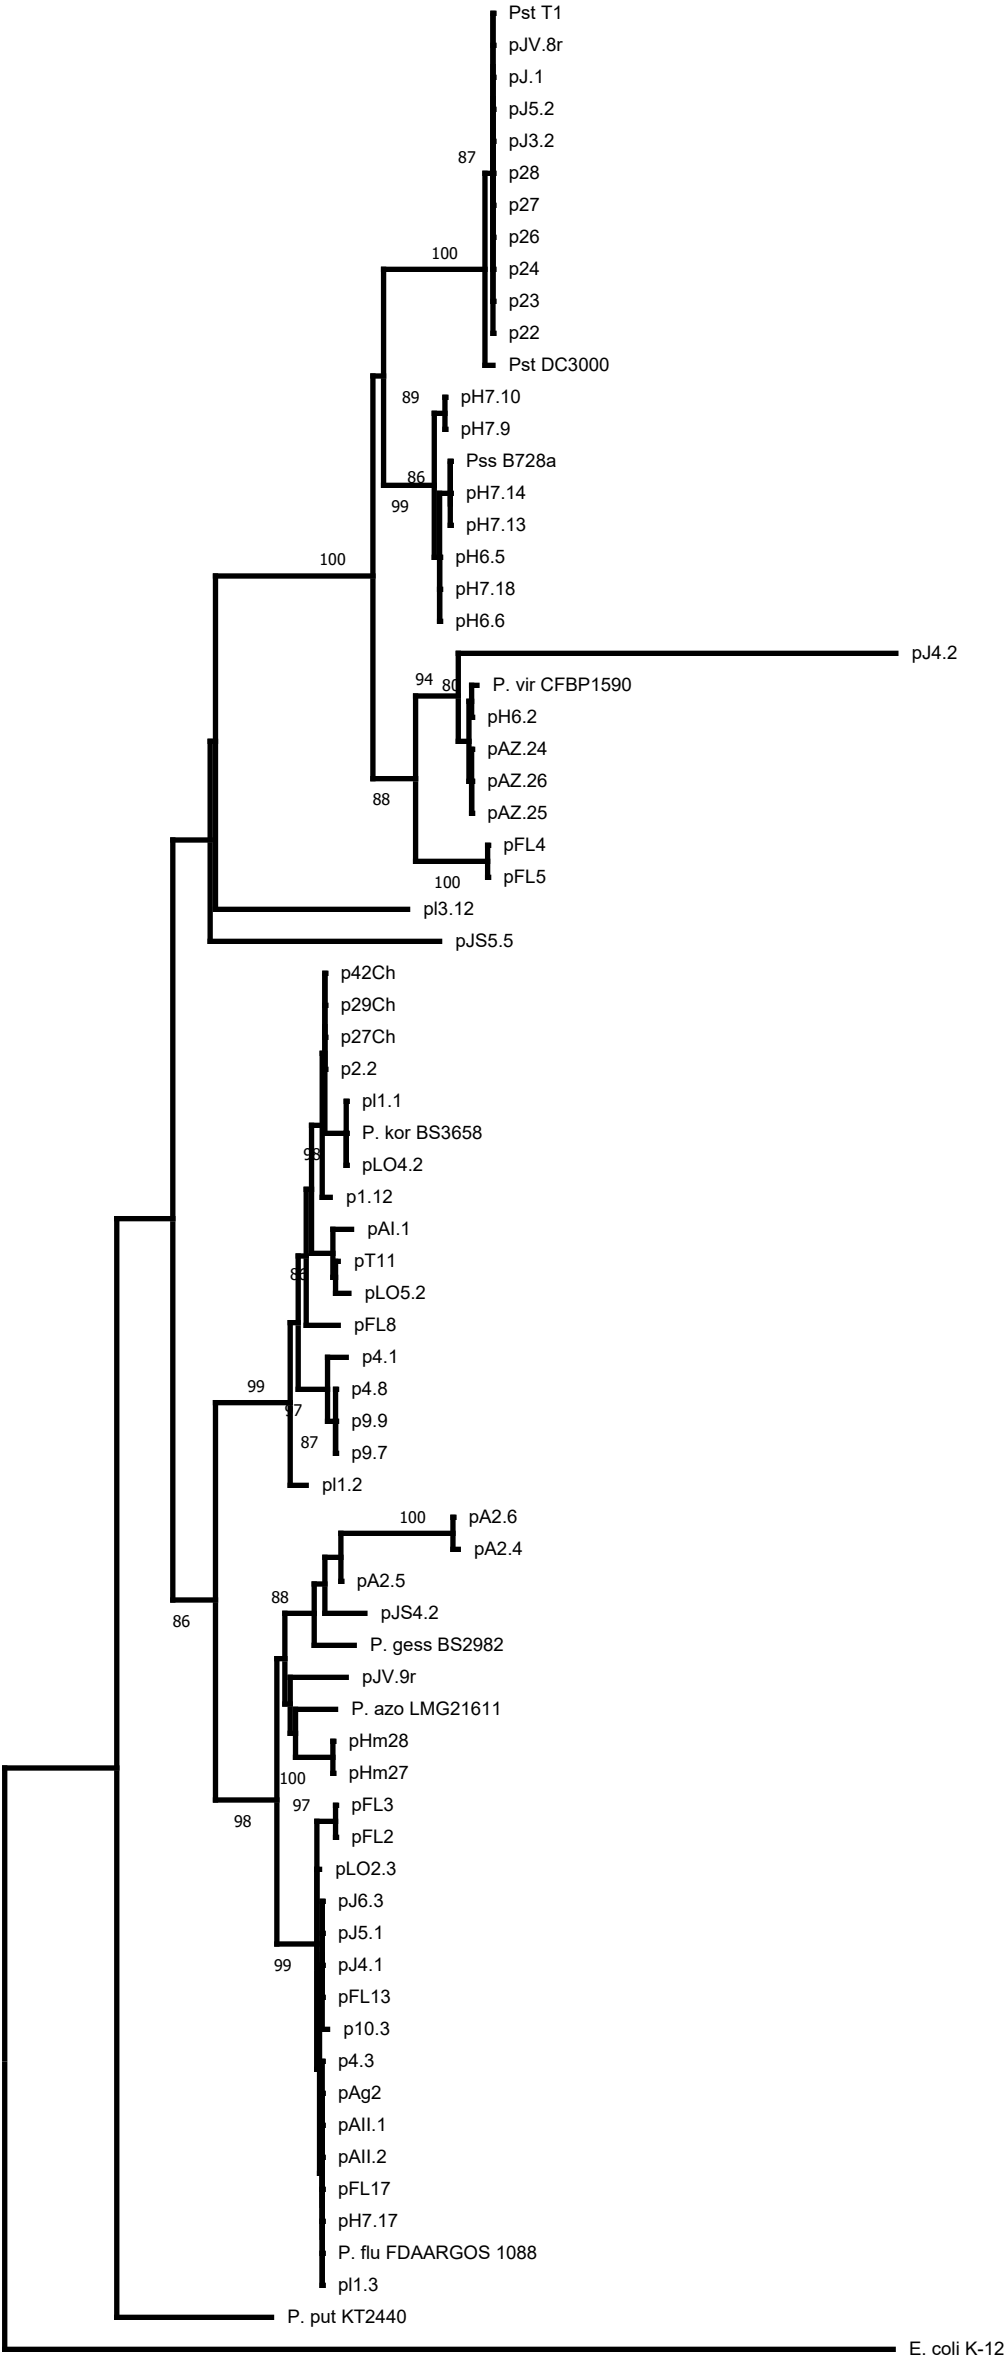

Supplement: s1 [file s1]

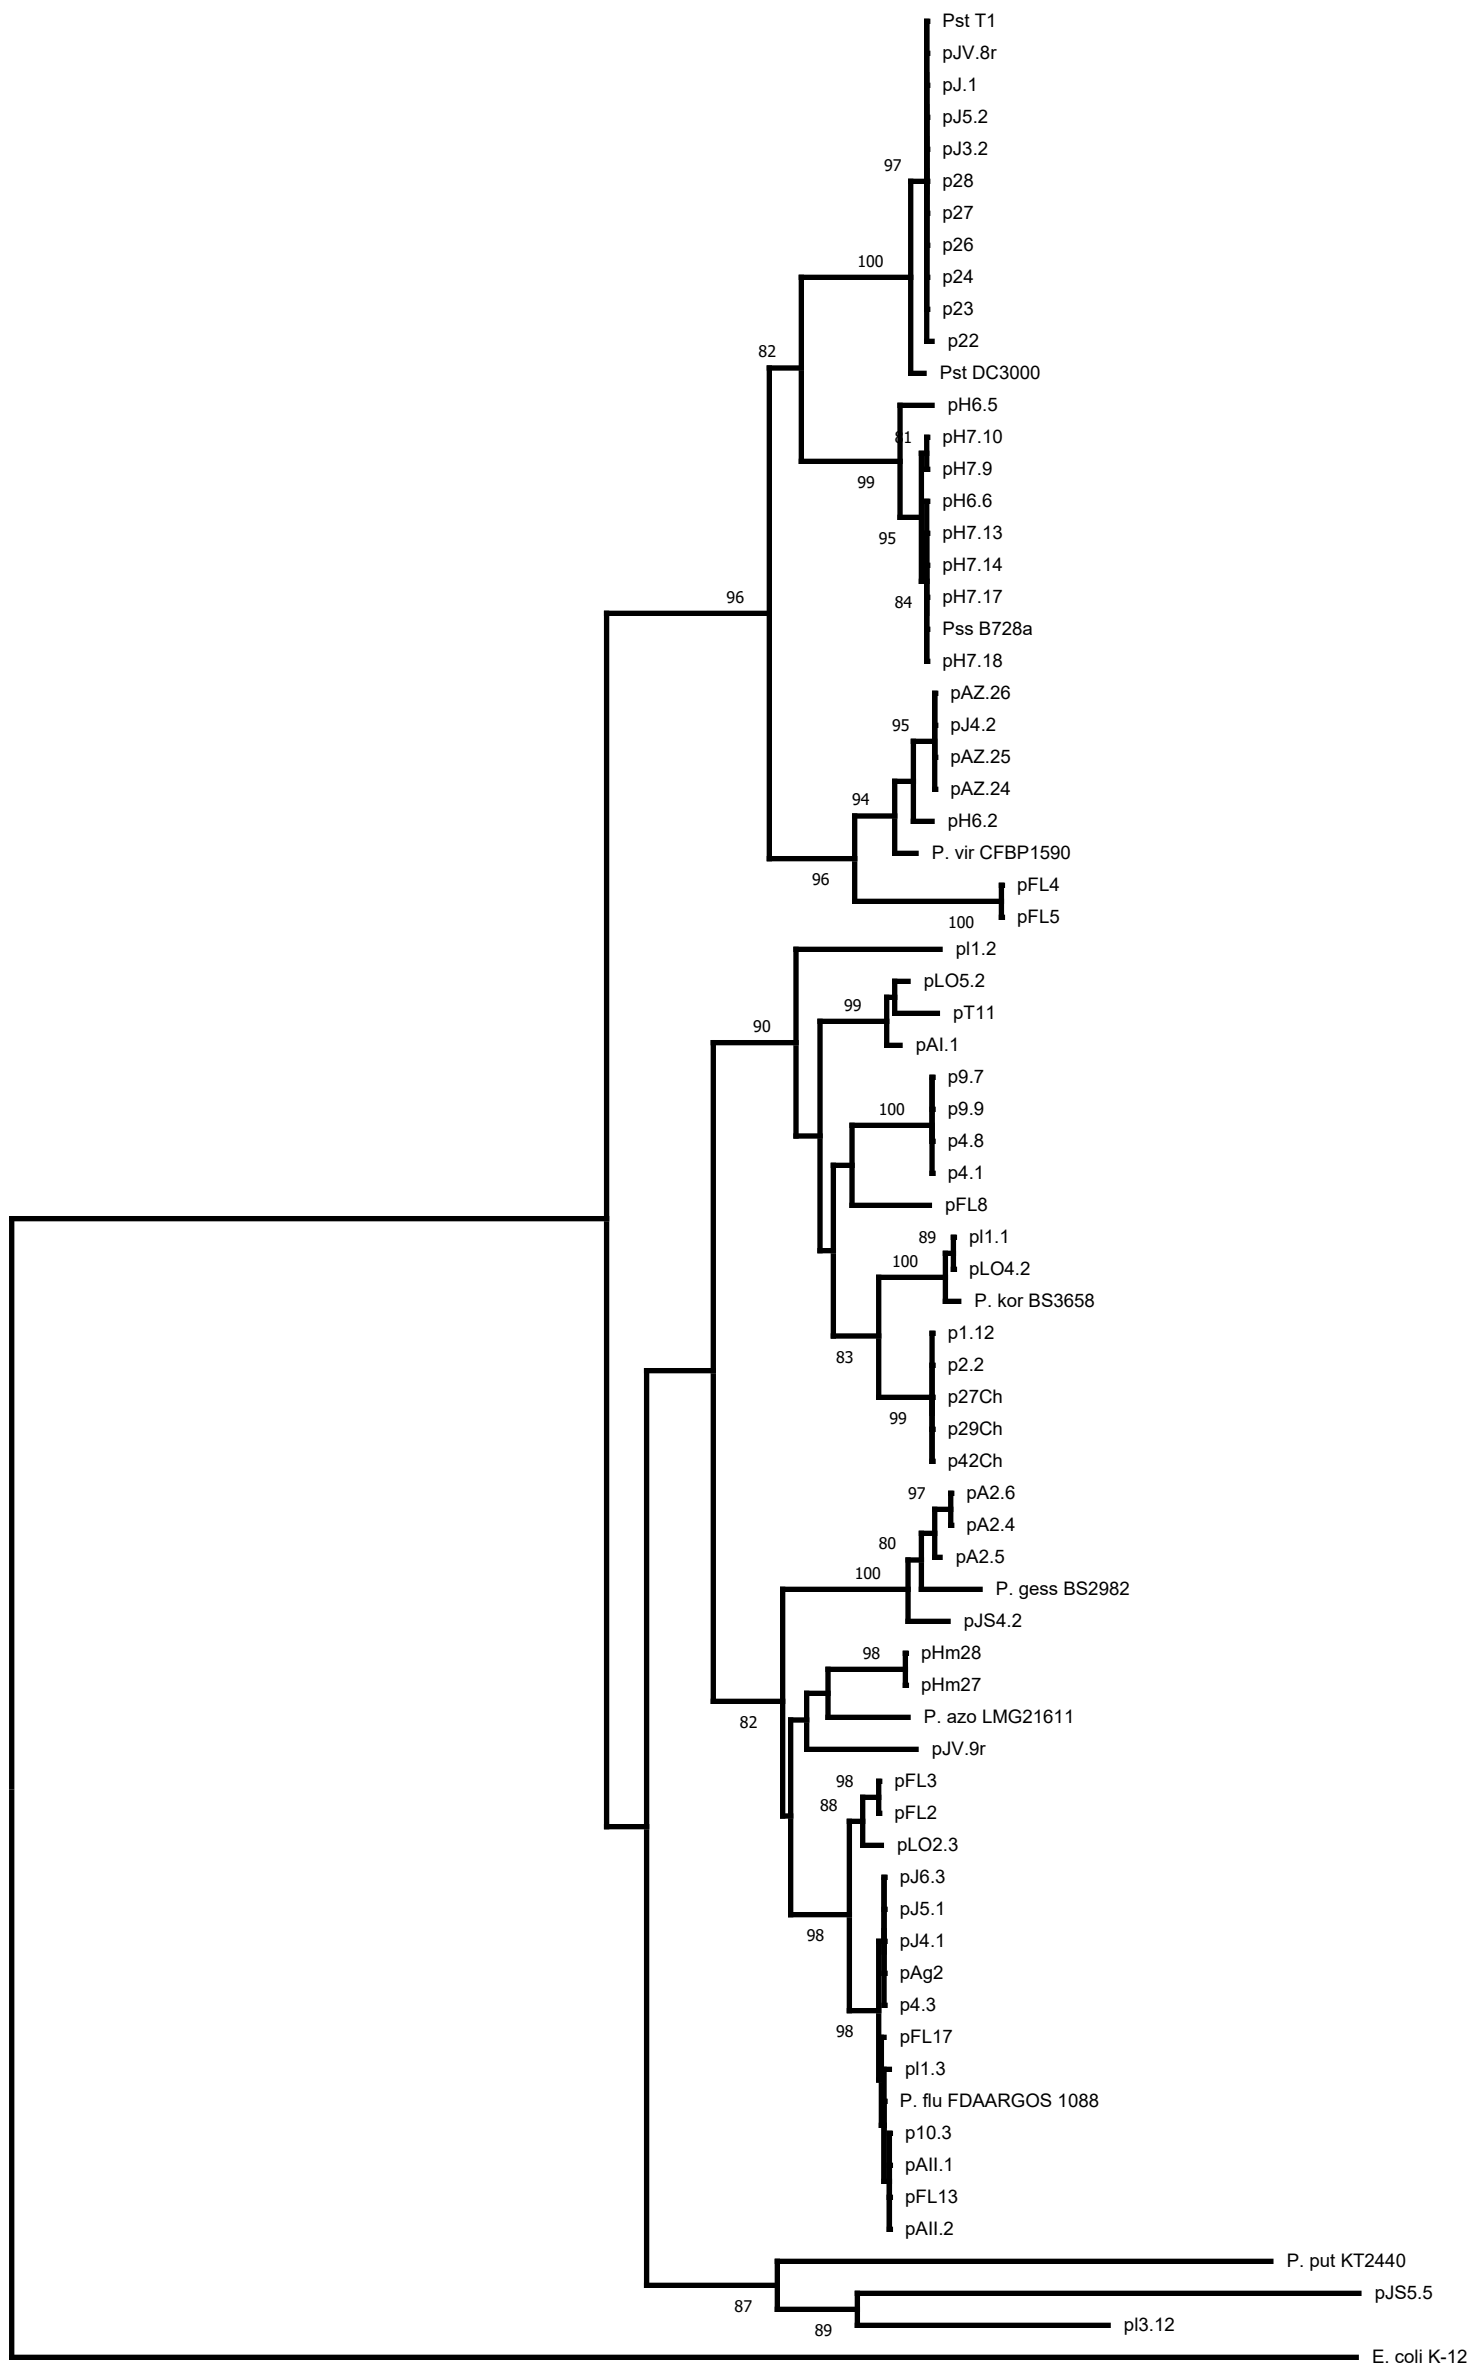

Supplement: s1 [file s1]

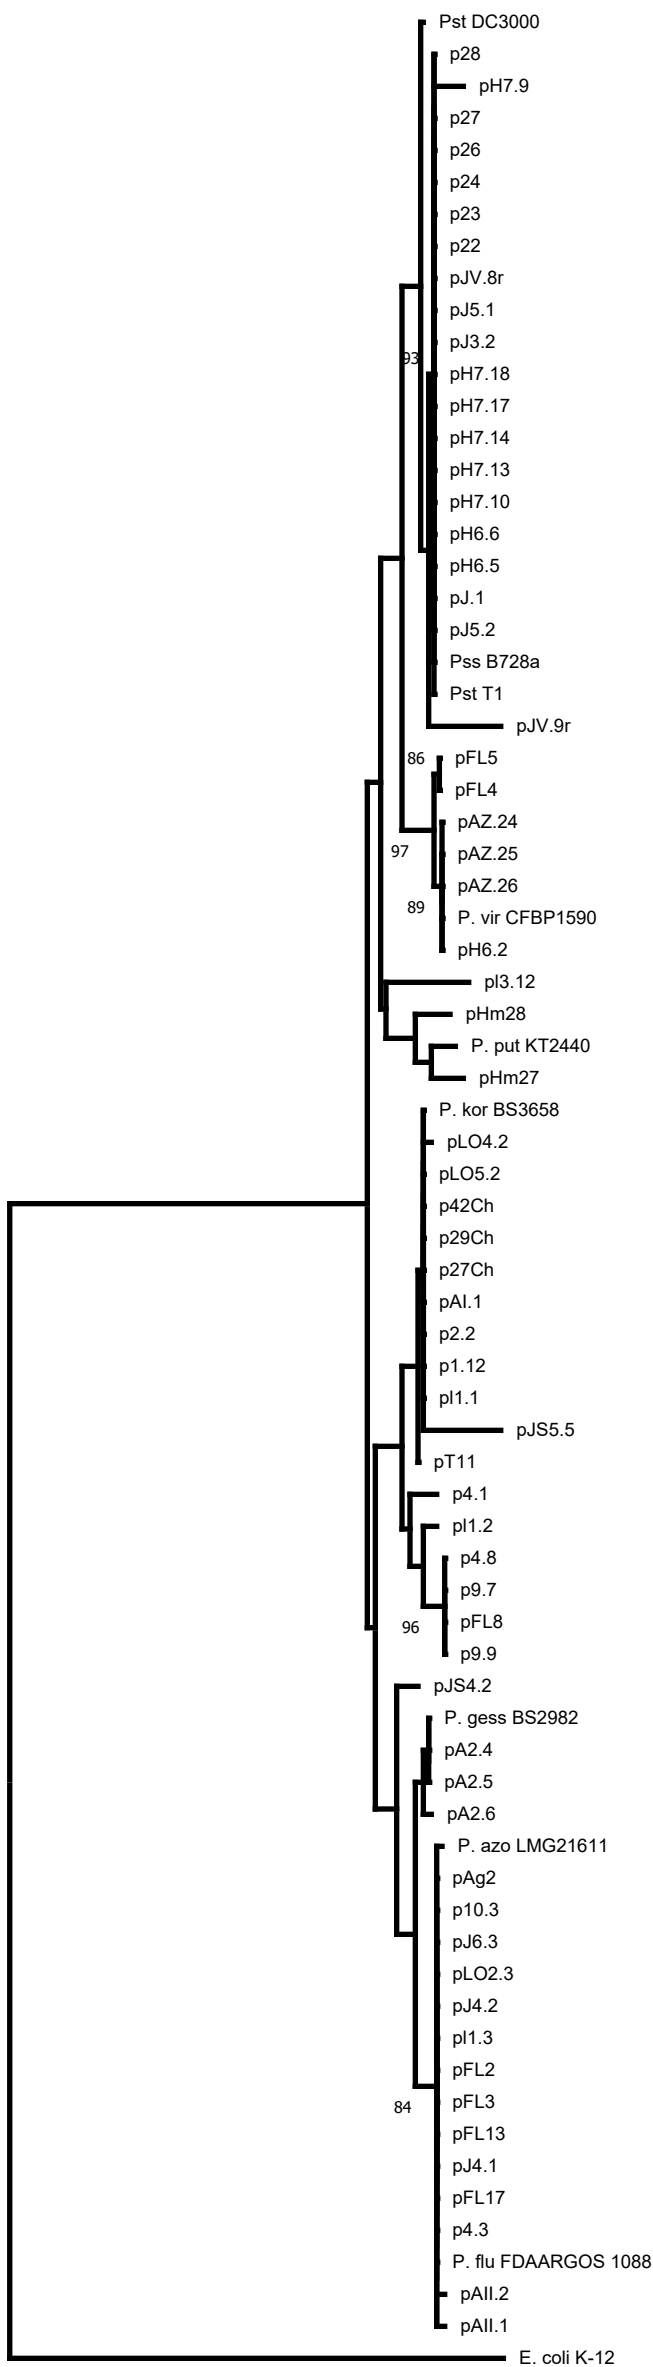

0.020

Supplement: s1 [file s1]

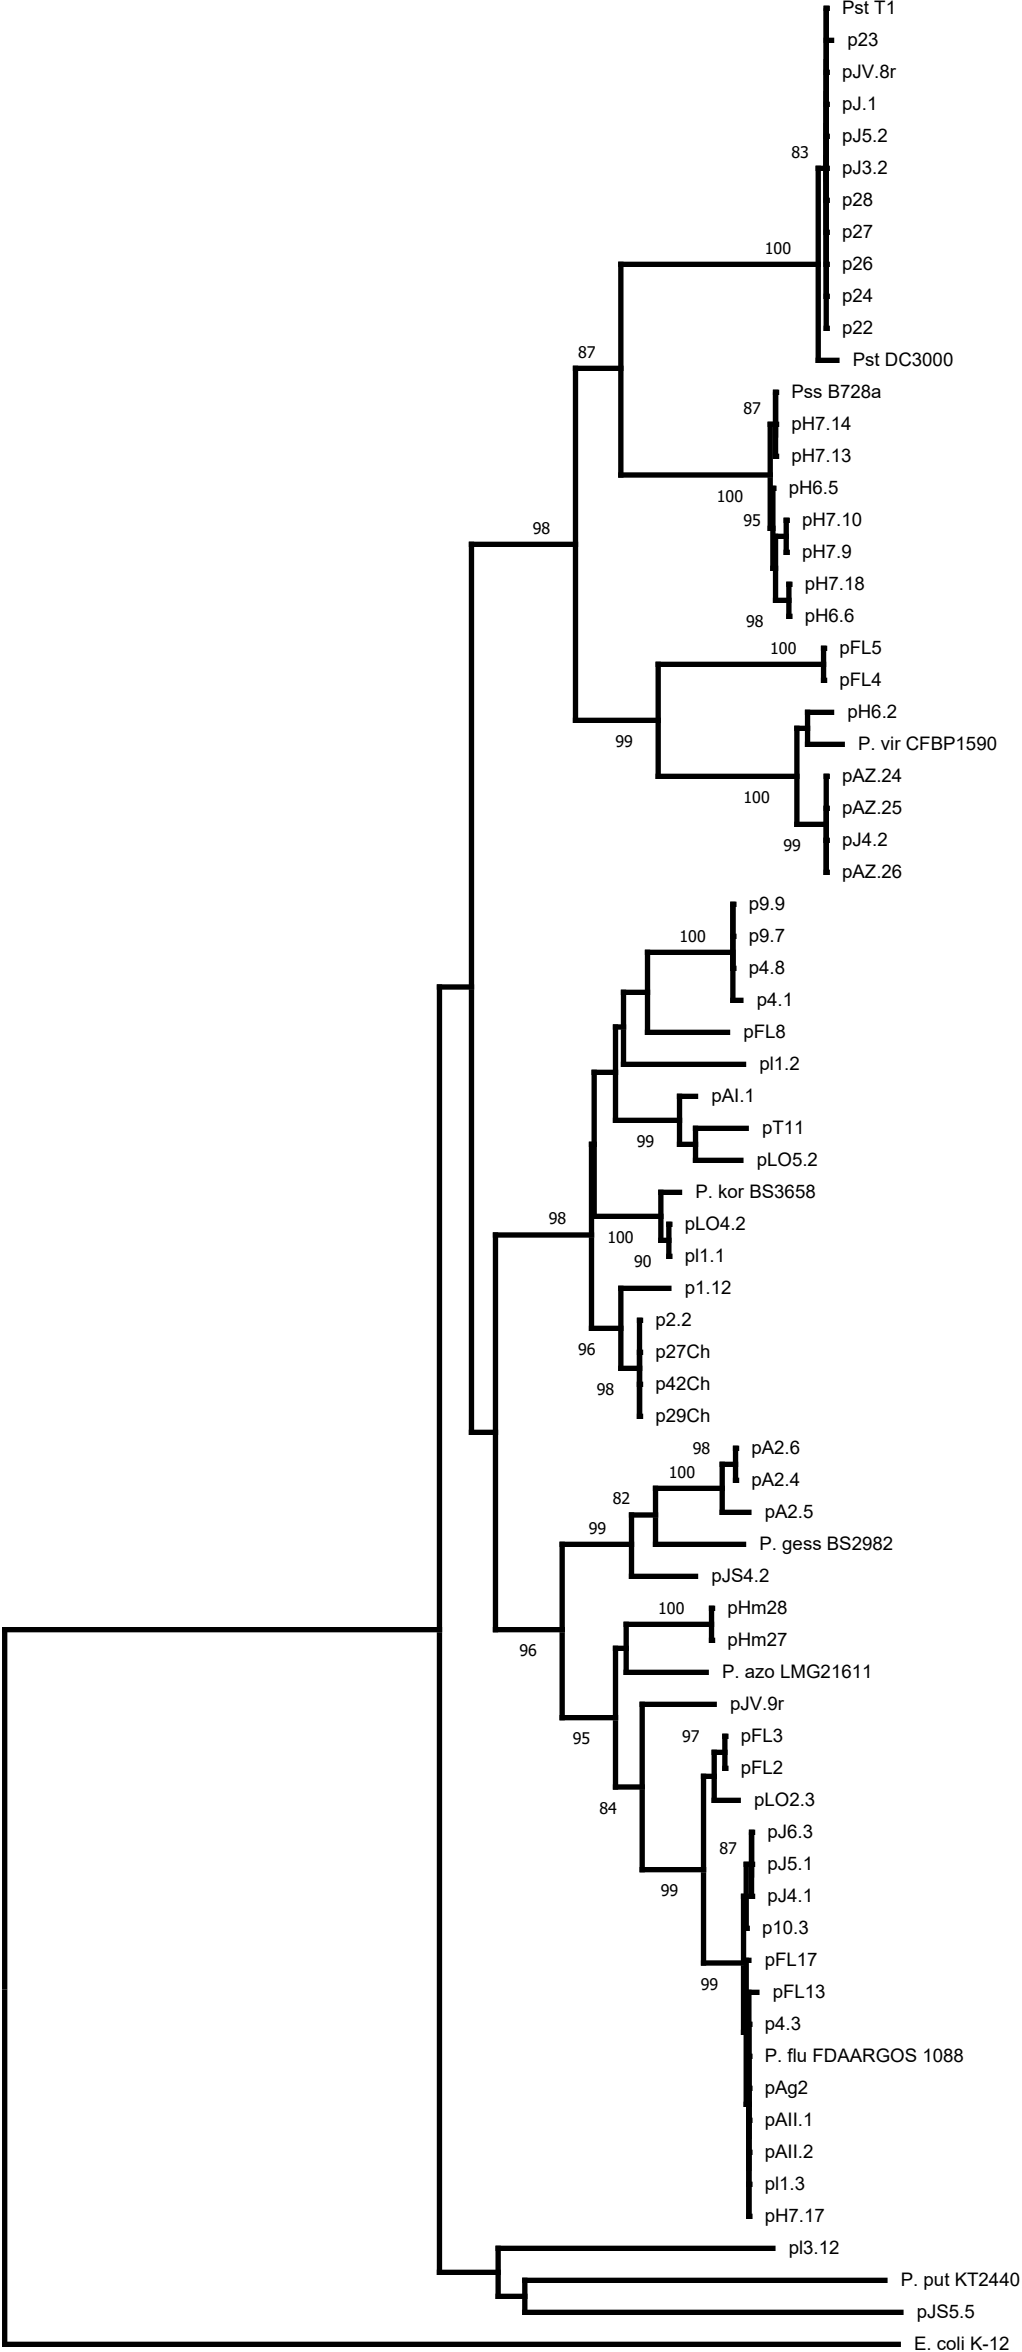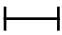

0.02

Supplement: s1 [file s1]

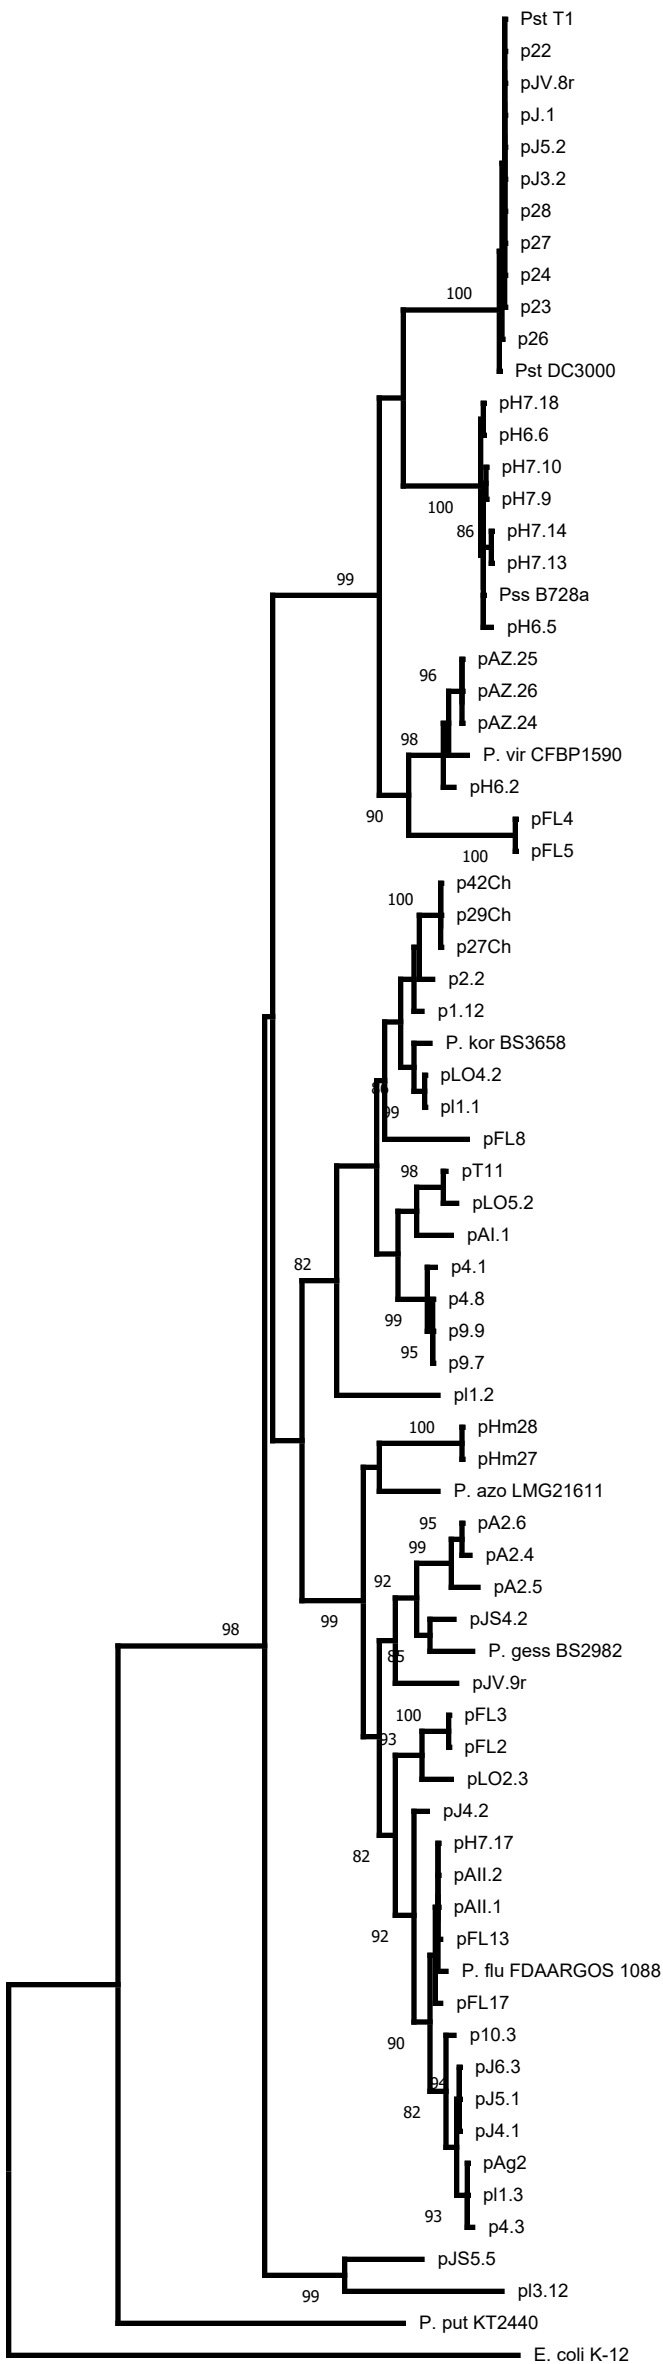

0.02

Supplement: s1 [file s1]
